# Supplementary material for: Classification and specific primer design for accurate detection of SARS-CoV-2 using deep learning
Source: PubMed Central journal article supplement (PMC7806918; doi:10.1038/s41598-020-80363-5), 2021-01-13
Supplement: 41598_2020_80363_MOESM1_ESM.pdf [file 41598_2020_80363_MOESM1_ESM.pdf]

# Classification and Specific Primer Design for Accurate Detection of SARS-CoV-2 Using Deep Learning: Supplementary Information

ALEJANDRO LOPEZ-RINCON<sup>1,\*</sup>, ALBERTO TONDA<sup>2</sup>,  
LUCERO MENDOZA-MALDONADO<sup>3</sup>, DAPHNE G.J.C.  
MULDERS<sup>4</sup>, RICHARD MOLENKAMP<sup>4</sup>, CARMINA A.  
PEREZ-ROMERO<sup>5</sup>, ERIC CLAASSEN<sup>6</sup>, JOHAN GARSSEN<sup>1,7</sup>,  
AND ALETTA D. KRANEVELD<sup>1</sup>

<sup>1</sup>Division of Pharmacology, Utrecht Institute for Pharmaceutical Sciences, Faculty of Science, Utrecht University, Universiteitsweg 99, 3584 CG Utrecht, the Netherlands

<sup>2</sup>UMR 518 MIA-Paris, INRAE, c/o 113 rue Nationale, 75103, Paris, France

<sup>3</sup>Hospital Civil de Guadalajara "Dr. Juan I. Menchaca". Salvador Quevedo y Zubieta 750, Independencia Oriente, C.P. 44340 Guadalajara, Jalisco, México

<sup>4</sup>Department of Viroscience, Erasmus Medical Center, Rotterdam, the Netherlands

<sup>5</sup>Departamento de Investigación, Universidad Central de Querétaro (UNICEQ), Av. 5 de Febrero 1602, San Pablo, 76130 Santiago de Querétaro, Qro., Mexico

<sup>6</sup>Athena Institute, Vrije Universiteit, De Boelelaan 1085, 1081 HV Amsterdam, the Netherlands

<sup>7</sup>Department Immunology, Danone Nutricia research, Uppsalalaan 12, 3584 CT Utrecht, the Netherlands

\*a.lopezrincon@uu.nl

## 1. CNN ARCHITECTURE AND VISUALIZATION

The original samples used in the experiments are virus sequences, e.g. a series of base pairs [A, C, C, G, T, ...]. Before the start of the experiments with the CNN, the sequences are converted to numerical values, using the following representation: N (missing) → 0.0, C → 0.25, T → 0.5, G → 0.75, A → 1.0, so that the sequence in the previous example would become [1.0, 0.25, 0.25, 0.75, 0.5, ...].

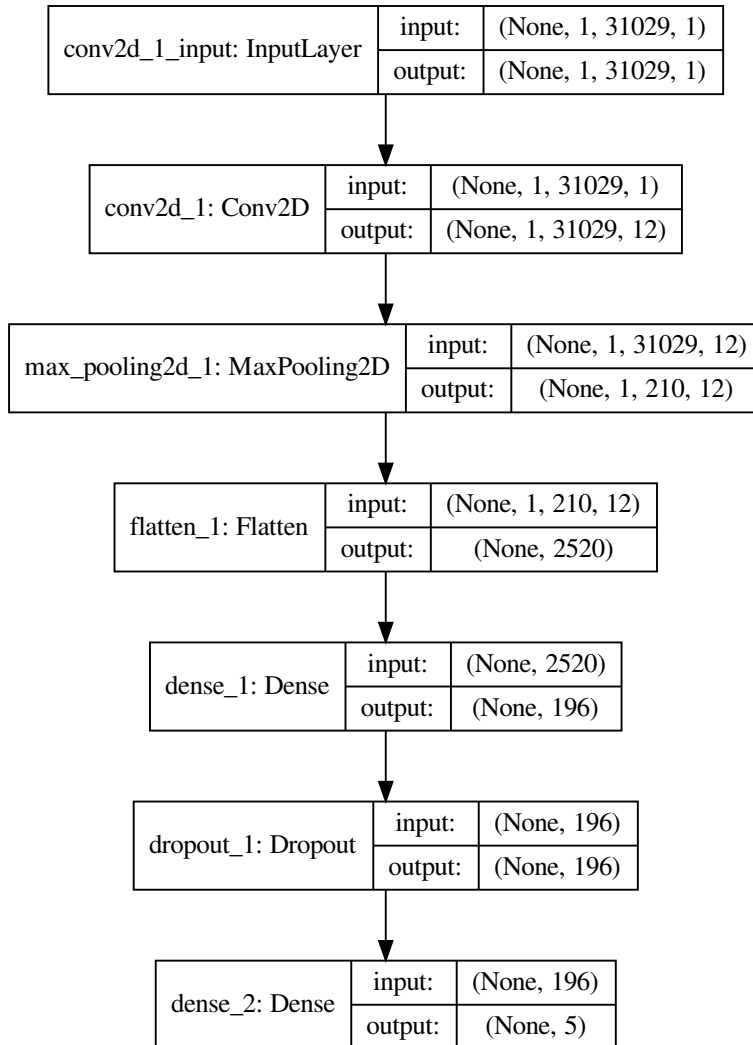

**Fig. S1.** Shapes of tensors in the CNN used in the experiments.

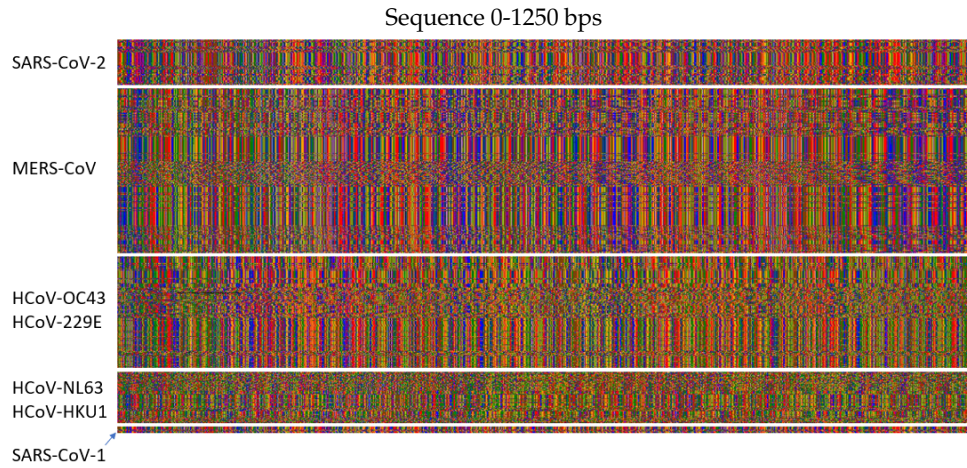

**Fig. S2.** cDNA visualization for the first 1,250 bps from the input NGDC dataset, for each of the 553 samples. Each sample is represented by a horizontal line of pixels. Colored pixels represent bases: G=green, C=blue, A=red, T=orange, missing=black. The data is separated by class SARS-CoV1: SARS-CoV, SARS-CoV P2, SARS-CoV HKU-39849 and SARS-CoV GDH-BJH01. For visualization purposes we do not show HCoV-EMC and HCoV-4408, given the number of examples.

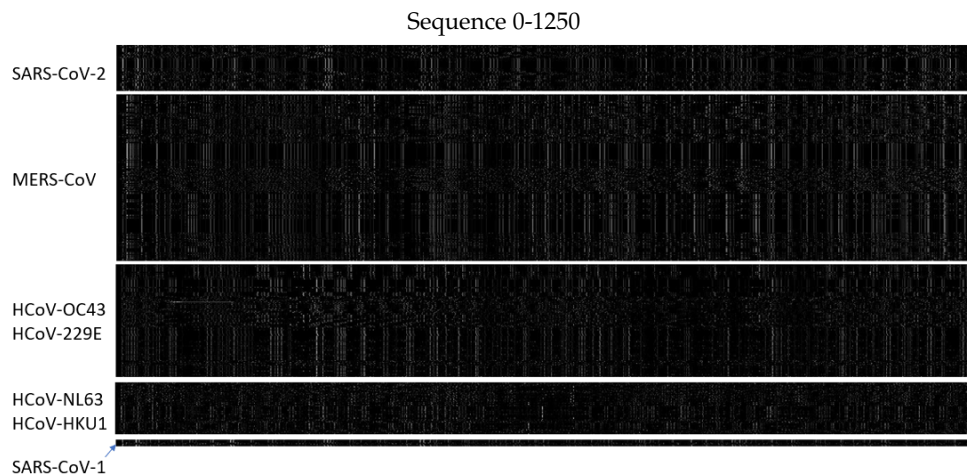

**Fig. S3.** The output of convolutional filter 0, for the input given in Fig. S2. The output of the filters is a series of continuous values in  $(0, 1)$ , here represented in grayscale, with higher values closer to white.

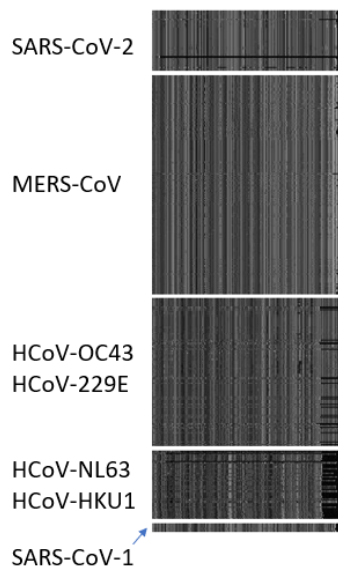

**Fig. S4.** Visualization of the output of the max pooling for the first filter of the CNN, with the data visualized in Fig. S3 in input. Different patterns for samples from different classes are recognizable from a simple visual inspection. Here samples from the same class appear grouped, one after the other, for clarity.

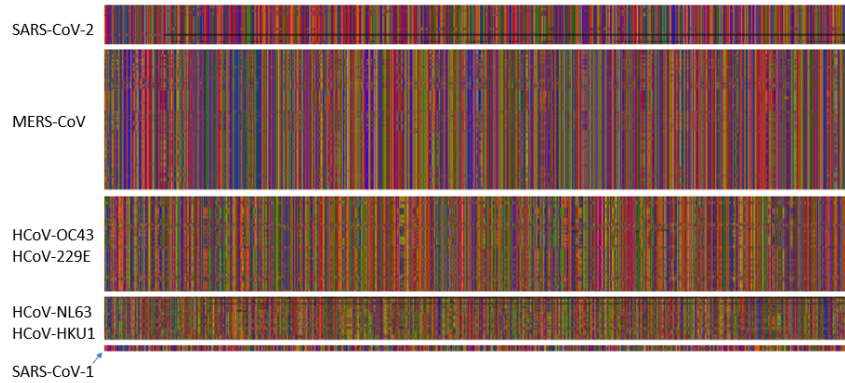

(a) 0 - 2,205 bps

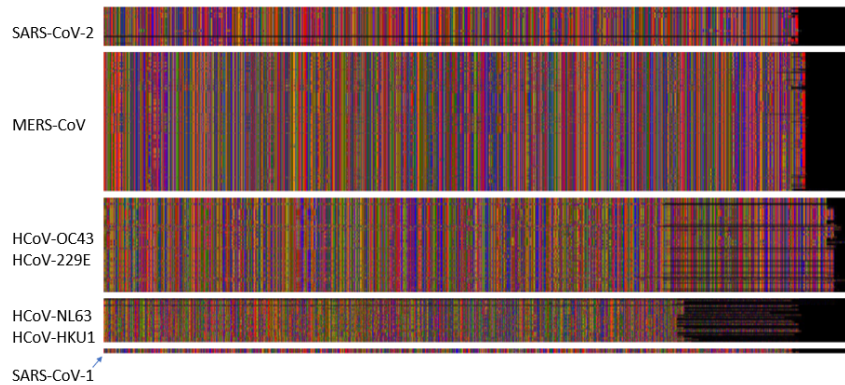

(b) 2,205 - 4,410 bps

**Fig. S5.** cDNA visualization for the selected 210 21-bps-long sequences selected from the input dataset. Each sample is represented by a horizontal line of pixels. Colored pixels represent bases: G=green, C=blue, A=red, T=orange, missing=black. We divide the whole information, for visualization purposes; from visual inspection we can see the similarity of the patterns between the classes.

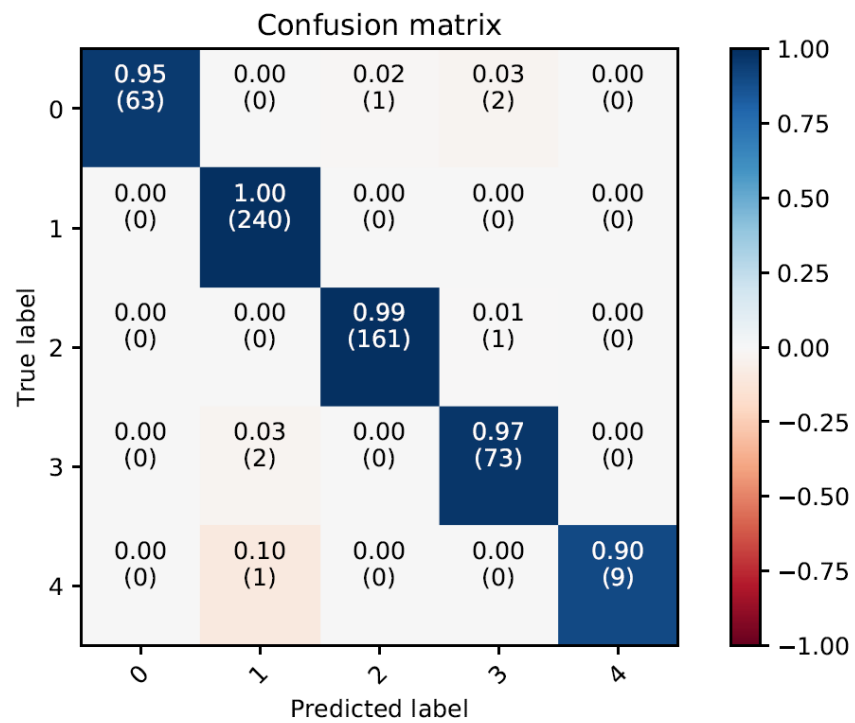

**Fig. S6.** Confusion Matrix of the 10-fold cross-validation in the original 553 SARS-CoV-2 sequences.

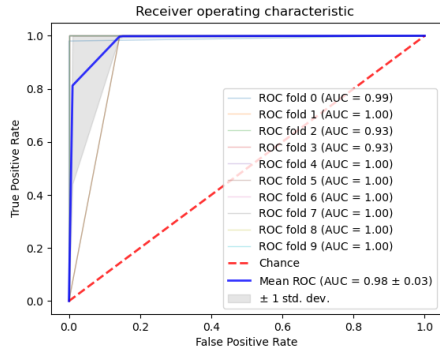

(a) Class 0.

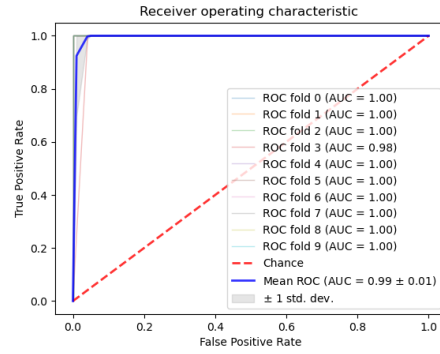

(b) Class 1.

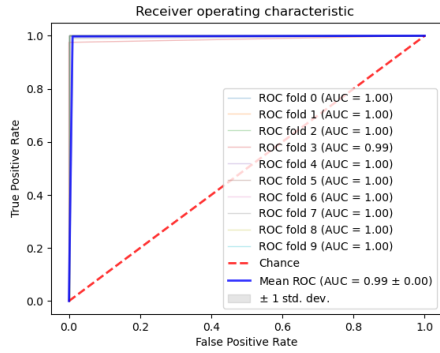

(c) Class 2.

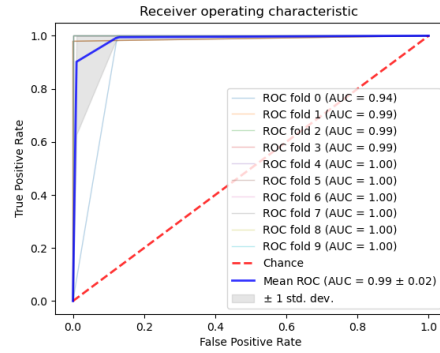

(d) Class 3.

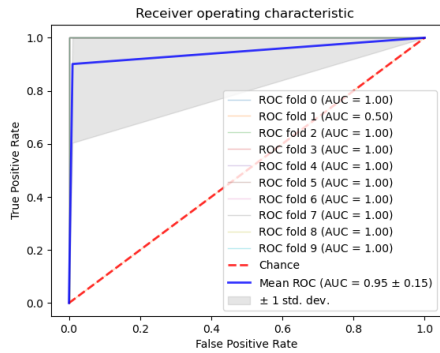

(e) Class 4.

**Fig. S7.** Resulting Binary ROC curves, for each of the classes in 10-fold cross-validation from the CNN model.

## 2. SEQUENCES USED TO GENERATE THE ORIGINAL MODEL

**Table S1.** IDs of the 553 sequences to create the CNN model.

|           |          |          |          |          |                 |          |          |          |          |                 |          |
|-----------|----------|----------|----------|----------|-----------------|----------|----------|----------|----------|-----------------|----------|
| NC_045512 | MF542265 | KY688124 | KF600647 | KP923912 | CNA0007332      | MH940245 | MG546330 | KT121581 | KF923896 | KF514432        | MT152824 |
| MN120514  | KX154693 | MK796425 | KF600630 | KP923913 | CNA0007334      | MH310910 | MF000458 | KT121578 | KJ958219 | KF530090        | MT050493 |
| MN120513  | KX154694 | KY688123 | KF600644 | KP923914 | CNA0007335      | MG912598 | MG757603 | KT121579 | KJ958218 | KF530074        | MT012098 |
| MN365233  | KX154692 | KT806046 | KF600645 | KP923915 | GWHABKK00000001 | MG912596 | MF000459 | KJ813439 | KU131570 | KF530097        |          |
| MN365232  | KX154691 | KY688119 | KF186567 | KP923916 | GWHABKL00000001 | MG366483 | MG757601 | KT121580 | KX344031 | KF530071        |          |
| MN306041  | MF374983 | KT806047 | KJ361501 | KP923917 | GWHABKM00000001 | MG912597 | KU521535 | KM027262 | KF923925 | KF530079        |          |
| MN310476  | KX154684 | KT026454 | KJ361502 | KP923891 | GWHABKN00000001 | MK062184 | MG757600 | KT861628 | KF923888 | KF530094        |          |
| MN306042  | KX154685 | KT026456 | KJ361503 | KP923892 | GWHABKO00000001 | MK062183 | MG757602 | KM027260 | KF923893 | KF530067        |          |
| MN306036  | KX154686 | KT806045 | KF600627 | KP923894 | NMDC60013002-05 | MG912595 | KX179500 | MK039552 | KF923895 | KF530082        |          |
| MN306043  | KX154687 | KT806049 | KF745068 | KP923907 | NMDC60013002-06 | MK062182 | MF000460 | KY581693 | KF923924 | KF530095        |          |
| MN310478  | KX154688 | KT806054 | KJ156866 | KP923921 | NMDC60013002-07 | MK062181 | KU851863 | KP209309 | MG428701 | KF530089        |          |
| MN306044  | KY756904 | KT806055 | KF186564 | KP923890 | NMDC60013002-09 | MK062180 | MG757598 | KM027261 | MG428703 | KF530091        |          |
| MN306046  | KX154689 | KT026453 | KJ361500 | KY014282 | NMDC60013002-10 | MK062179 | MH029552 | KJ581692 | KP198610 | KF530107        |          |
| MN306053  | KX154690 | KT806044 | KF186565 | KP923900 | MT007544        | MH310912 | MG757599 | KM027259 | MG428706 | KF530096        |          |
| MK129253  | KY621348 | KT806048 | KF186566 | KP923899 | MN938384        | MH310909 | MF000457 | KP209313 | MG428705 | KF530076        |          |
| MK462256  | KY554971 | KY688118 | KJ156952 | KP923889 | MT020781        | MH432120 | MG757594 | KM027258 | MG428704 | KF530113        |          |
| MK462255  | KY554970 | KT806051 | KX538979 | JQ765575 | LC521925        | MG011360 | MG757597 | KY581690 | MG428699 | KF530104        |          |
| MK334046  | KY554968 | KT806052 | KM210277 | JQ765574 | MT027062        | MF374985 | KU851860 | KP209307 | MG428702 | KF530109        |          |
| MK462254  | KY684760 | KT806053 | KM210278 | KP923905 | MT027064        | MG011361 | KU851861 | KP209308 | KP923918 | KF530088        |          |
| MK462251  | KY369911 | KX179496 | KM015348 | JQ765573 | MT039890        | MF374984 | KU851862 | KY581688 | KP923887 | KF530061        |          |
| MH822886  | KY369908 | KX179499 | KF600613 | HM034837 | MT039888        | MK167038 | KU851864 | KY581689 | KF923886 | KF530065        |          |
| MK483839  | KY369912 | KR011265 | KX538978 | JQ765572 | MT039887        | MG011362 | MG757596 | KY581686 | KF430201 | KF530066        |          |
| MK334043  | KY369913 | KX179498 | KF192507 | JQ765571 | CNA0007333      | MH121121 | MG757595 | KP209306 | KF686341 | KF530111        |          |
| MK334045  | KY369914 | KR011263 | KF600652 | JQ765570 | MT044257        | MG977452 | MG757593 | KM027257 | KF686346 | KF530073        |          |
| MK462252  | KY674917 | KT266906 | KF600612 | JQ765569 | MT044258        | MG977451 | KU851859 | KP209310 | KF686343 | KF530108        |          |
| MK334047  | KY674916 | KY673148 | KC660774 | JQ765568 | MT049951        | MH454272 | KX034100 | KT861627 | KP198611 | KF530114        |          |
| MK462251  | KY674918 | KT381875 | KC164505 | JN129834 | LC522973        | MH395139 | KT374050 | KM027255 | JX030600 | FJ415324        |          |
| MK334044  | KY674915 | KU291448 | KX538977 | JN129835 | LC522974        | MG011358 | KX034099 | KM027256 | KF686344 | KF530106        |          |
| MK462250  | KY674914 | KY967360 | KX538976 | FJ882963 | LC522975        | MG011357 | KT374057 | KY581694 | KF686342 | KF530083        |          |
| MK462249  | KY554974 | KY829118 | KX538975 | JX504050 | LC522972        | MH306207 | KX034098 | KT156561 | KF686340 | KF530077        |          |
| MK462248  | KY554973 | KY967356 | KX538974 | GU553363 | MT066175        | MG011352 | KT374056 | KY581687 | KT779555 | KF530087        |          |
| MK462247  | KY674941 | KY967357 | KX538973 | KY014281 | MT066176        | MG011356 | KT374055 | KP209312 | KT779556 | KF530086        |          |
| MN026164  | KY674943 | KY967358 | KX538972 | KF530112 | MT072688        | MG011355 | KX034096 | KJ556336 | FJ938067 | KF530085        |          |
| MN369046  | KY674921 | KY967359 | KX538971 | KF530105 | MT081059        | MG011354 | KX034097 | KF958702 | JQ765563 | KF530060        |          |
| MN306018  | KY554967 | KY983585 | KX538970 | KF530092 | MT081066        | MG011353 | KT225476 | KT156560 | JQ765567 | KF530110        |          |
| MK462246  | KY554972 | KY983587 | KF600620 | KF530068 | MT093571        | MG011348 | MG366883 | KF961222 | JQ765564 | AY274119        |          |
| MK462245  | KY684759 | KY983583 | JX869059 | KF530070 | MT093631        | MG757605 | KT374053 | KF961221 | KF923922 | AY597011        |          |
| MK462244  | KY674942 | KY983586 | KP923897 | KF530081 | MT106053        | MG011349 | KX034094 | KJ156874 | JQ765565 | DQ640652        |          |
| MK462243  | KY554975 | KY983588 | KX538969 | KF530069 | MT106052        | MG011351 | KU308549 | KJ156934 | JX524171 | MN975262        |          |
| MG912605  | KY369909 | KY967361 | KX538968 | KF530080 | MT106054        | MG011350 | MG366881 | KJ156910 | JX503061 | GWHABKF00000001 |          |
| MG912604  | KY674919 | MG772808 | KX538967 | KF530072 | MT118835        | MG011359 | MG366882 | KJ156869 | JX104161 | GWHABKG00000001 |          |
| MG912606  | KY674920 | KU710264 | KP923902 | KF530099 | MT123290        | MG011345 | KX034095 | KY581685 | KF923923 | GWHABKH00000001 |          |
| MG912608  | KY554969 | KU710265 | KP923903 | KF530063 | MT123291        | MG011346 | MG366880 | KY581684 | JQ765566 | GWHABKI00000001 |          |
| MG912603  | KY369910 | KP223131 | KP923904 | KF530078 | MT123292        | MG011347 | KT374052 | KJ156944 | KF923919 | GWHABKJ00000001 |          |
| MG912602  | KY369905 | MK052676 | KX538966 | KF530064 | MT123293        | MG011344 | KT006149 | KJ156949 | KF923920 | MN988713        |          |
| MG912607  | KY369906 | KT121576 | KC776174 | KF530098 | LC528232        | MG011343 | KY688122 | KJ156881 | KF923901 | MN985325        |          |
| MG912601  | KY369907 | KT121572 | KX538965 | KF530075 | LC528233        | MF314143 | KT326819 | KF600628 | KF923908 | MN994467        |          |
| MG912600  | MG546331 | KT121577 | KP923898 | KF530084 | MT126808        | MG011342 | KY688121 | KF600634 | KF923909 | MN994468        |          |
| MG912599  | MG520076 | KJ829365 | KP923906 | KF514430 | MT135041        | MG011341 | MK280984 | KF600632 | KF923910 | MN997409        |          |
| MH310911  | MH013216 | KT121574 | KX538964 | KF514433 | MT135043        | MG011340 | KT029139 | KF600651 | KF923911 | MN988668        |          |



### 3. FEATURE LIST TO CLASSIFY DIFFERENT CORONAVIRUSES

**Table S2**

|                        |                        |
|------------------------|------------------------|
| TACAACATACCCTACTAATGT  | CACCACTATTTGGGTTAACCC  |
| TAGCATTAAACCATGATTTGTT | GTTGAATGATCTTTGCTTCTC  |
| GGTGATAAATTAGATCAGTTC  | AGCGATAGGTTTTATCGACTT  |
| CTAAAGCATACAATGTAACAC  | CAAAAGTAACTAGTGCTATGC  |
| TACCAGTGATTTAGGTAGTCT  | TGCTTTAGATCAAGCTATTC   |
| AGGTCAAGAGCAAACCTAACTG | TAAACTTACCTGGAGGGTTC   |
| GAAGAGCTACCAGACGAATTC  | GATTCTCAAATTTCTCATTAC  |
| TGAATATAAATGATTGCACTC  | CGGCTTGATTCAATTCAAGCC  |
| GAAGGTAGTCGTGTGCCACAC  | TATTAACAAGGACACTTATGC  |
| TGTGGAGTATCCCATCATTTC  | TGGGCTCTTGCCAACCAATTC  |
| CTTCGGGAACGTGGTTGACCT  | TATTGACTATAGACACTATTC  |
| TGACTGCTAACAACTAACTG   | ATGCTATGGGCAAACCTGTGC  |
| CTTGGTTCACCGCTCTCACTC  | TATTGCTGACCTTGCTTGTGC  |
| CAAAATCAGCGAAATGCACCC  | TGACAGCTAACAACTAACTG   |
| GATTAATGATATGGTTTATTC  | CAAAGTCTACTATGGTAATGC  |
| TGTGTTTAGTCAAGTTGATTT  | CAATGTTTATTGTTATAACAC  |
| TGCTAACAACTAACTGCACC   | AAGAGAGAAGTTGCTTCATTT  |
| GCTGAATAAGCATATTGACGC  | TAAAGTTCATTTTTATTACCT  |
| GGGTTGCAACTGAGGGAGCCT  | TGGCTGCAACGTAACCTGACGT |
| AATTGGAATGTGGAGTATCCC  | CTGTGGCTACCTTGACGGCGC  |
| CTTGACAGATTGAACCAGCTT  | CAAATAGCACCTGTTCCAGCT  |
| AGGCGGCAGTCAAGCCTCTTC  | AATGTCTAAACTAAACGATGT  |
| TATTTGCAATTCAGCTGTTGC  | TGCTGATGATTCAGGTACTCC  |
| GGGCCAGAAGCTGGACTTCCC  | GACCTTAAATTCAGACAACGT  |
| AGACGTGGTCCAGAACAACC   | CATGCTGTACCGACTCTCTTT  |
| TATACTCAACTGTGTCAATAC  | TACAGAATTTTAAAGGAAACGC |
| TGGCCGCAAATTGCACAATTT  |                        |

#### 4. ORIGINAL FORMAT OF PCR RESULTS

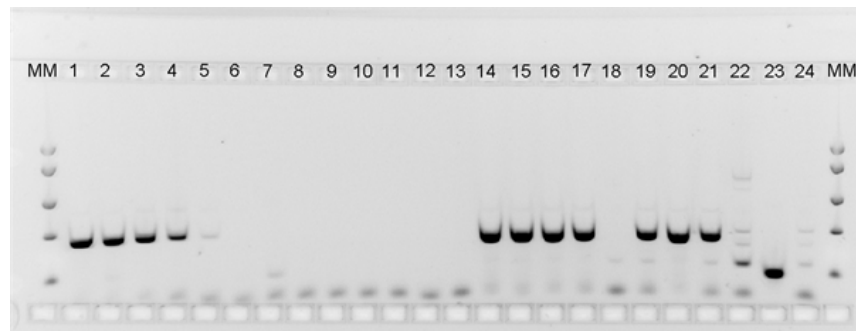

**Fig. S8.** Original format of PCR Results.

## 5. PROPOSED PIPELINE FOR AUTOMATED PRIMER DESIGN

The main paper *Classification and Specific Primer Design for Accurate Detection of SARS-CoV-2 Using Deep Learning* presented a series of experiments with the aim to explore the possibility of automatic primer design using artificial intelligence. Once this possibility is validated, the pipeline we propose to automatically design primers for a new virus will be:

- Collect samples** of the new virus, along with samples of other virus of the same family (the methodology showed promising results with just 500 samples total, but the more, the better);
- Train a CNN classifier** in a cross-validation on the dataset built in the previous step. If the average CNN classification exceeds a given threshold for a quality metric (e.g. classification accuracy above 95%), this is a good indication that the CNN learned meaningful features, and the pipeline can proceed to the following step;
- Extract features** using the max-pooling of the CNN filters, extract the position in the original data of 21-bps features;
- Prune features** from the feature set obtained at the previous step, by first discarding those that cannot qualify as primers due to their structure (e.g. they contain missing bps "N"), and then performing a feature selection on the remaining ones. If, after this step, it's possible to identify a small number of features that still provide a high classification accuracy, it is possible to proceed to the next step;
- Test features as primers** using an in-silico assessment of their quality, e.g. Primer3Plus. If the feature is considered as an "acceptable" left primer, the software will generate a right primer for the base sequence;
- In-vitro primer testing** performed in a lab. If the primers are confirmed to be qualitatively satisfying, the process is complete and the primers can be used on the market.
